# Supplementary material for: Ambidextrous strategy for improving innovation performance of multinationals in a turbulent environment: the moderating role of improvisational ability
Source: Research Square preprint supplement (doi:10.21203/rs.3.rs-6809582/v1), 2025-09-16
Supplement: Supplementary file 1 [file 14abdc3b66c630918475ccbd.docx]

**Highlights**

1. Ambidextrous internationalization strategy is still an effective strategy for multinational enterprises to effectively cope with the current international environment.

2. The combined dimension of international ambidexterity has a greater positive impact on innovation performance than the balanced dimension.

3. The ability to improvise is good for innovation.

4. Improvisational ability moderates the relationship between international ambidexterity and innovation.

5. Managers should develop both planned and improvised international business strategies.
